# Supplementary material
Source: PubMed Central journal article supplement (PMC4458711)

## SUPPLEMENTARY INFORMATION

### **Functional proteomic analysis of repressive histone methyltransferase complexes PRC2 and G9A reveals ZNF518B as a G9A regulator**

Verena K. Maier<sup>1</sup>, Caitlin M. Feeney<sup>2</sup>, Jordan E. Taylor<sup>2</sup>, Amanda L. Creech<sup>2</sup>, Jana W. Qiao<sup>2</sup>, Attila Szanto<sup>1</sup>, Partha P. Das<sup>3</sup>, Nicholas Chevrier<sup>4</sup>, Catherine Cifuentes-Rojas<sup>1</sup>, Stuart H. Orkin<sup>3</sup>, Steven A. Carr<sup>2</sup>, Jacob D. Jaffe<sup>2</sup>, Philipp Mertins<sup>2\*</sup> and Jeannie T. Lee<sup>1\*</sup>

## SUPPLEMENTARY METHODS

### **Western blotting**

8 µg of nuclear extracts used as input for SILAC affinity proteomics experiments were separated by 4-12% SDS-PAGE and transferred to nitrocellulose membranes. Proteins were detected with  $\alpha$ -Ezh2 antibody (BD Transduction Laboratories, 612667),  $\alpha$ -Ezh1 antibody (abcam, ab13633),  $\alpha$ -Suz12 antibody (Cell Signaling Technologies, D39F6),  $\alpha$ -G9A antibody (Perseus Proteomics, PP-A8620A-00), M2  $\alpha$ -FLAG antibody (Sigma-Aldrich, F7425) or  $\alpha$ -actin antibody (Sigma-Aldrich, 2066) and HRP conjugated secondary antibodies (Promega), and were visualized by Western Lightning *Plus* ECL (PerkinElmer). Biotin-tagged proteins were detected using HRP-coupled streptavidin.

### **Affinity purifications in the presence of RNase**

Purifications with RNase were conducted in parallel with no RNase samples, but 200 µg RNase A (Invitrogen) and 200 units RNase T1 (Ambion) were added to the samples along with TURBO DNase before the 25°C incubation step. Since no RNA-dependent interactors were identified, data is not shown in the main text, but can be found in the raw data table.

## SUPPLEMENTARY TABLE LEGENDS

**Table S1: Lists of all identified EZH2, EZH1, SUZ12 and G9A interaction partners in mouse ESCs and their stoichiometries with respect to the bait protein**

**Table S2: Data table of affinity proteomics mass spectrometry experiments**

**Table S3: List of lentiviral shRNA constructs, corresponding knock-down efficiencies in mouse ESCs and primer sequences used for measuring expression levels of target proteins**

## SUPPLEMENTARY FIGURE LEGENDS

**Supplementary Figure 1: Tagged transgenes were expressed at physiological or subphysiological levels in mESCs.** (a) Western blots of nuclear extracts of *Ezh2*<sup>-/-</sup> mESCs or J1 mESCs expressing FLAGbio-tagged EZH2, EZH1 or SUZ12 probed with  $\alpha$ -EZH2-,  $\alpha$ -EZH1-, or  $\alpha$ -SUZ12-antibody and of F1-2-1 mESCs expressing G9A-3xFLAG probed with  $\alpha$ -G9A- or  $\alpha$ -FLAG-antibody as indicated. ACTIN served as a loading control. (b) Western blot membrane with nuclear extracts from mESCs expressing FLAGbio-EZH2, -EZH1 or -SUZ12 probed with streptavidin-coupled HRP.

**Supplementary Figure 2: SILAC affinity proteomics experiments are very reproducible.**

Bait pull-down to negative control protein ratios measured in individual replicates of affinity purifications with EZH2, EZH1, SUZ12 and G9A are plotted against each other ( $\log_2$  scale; below diagonal). Pearson correlation coefficients for pairwise comparisons are displayed above the diagonal. Frequency distribution histograms of the  $\log_2$  SILAC ratios are displayed on the diagonal boxes.

**Supplementary Figure 3: Residual mRNA expression after shRNA knock-down in J1 mESCs measured by qPCR.**

**Supplementary Figure 4: Effects of individual knock-downs of members of PRC2, the G9A-complex and selected interaction partners on 42 histone H3 posttranslational modification signatures were measured by global chromatin profiling.** Heatmap displaying relative changes of tail modifications caused by individual knock-down with up to three different shRNAs directed against genes of interest as indicated. Empty control lentivirus and shRNA against RFP served as negative controls.

# Supplementary Figure 1

**a**

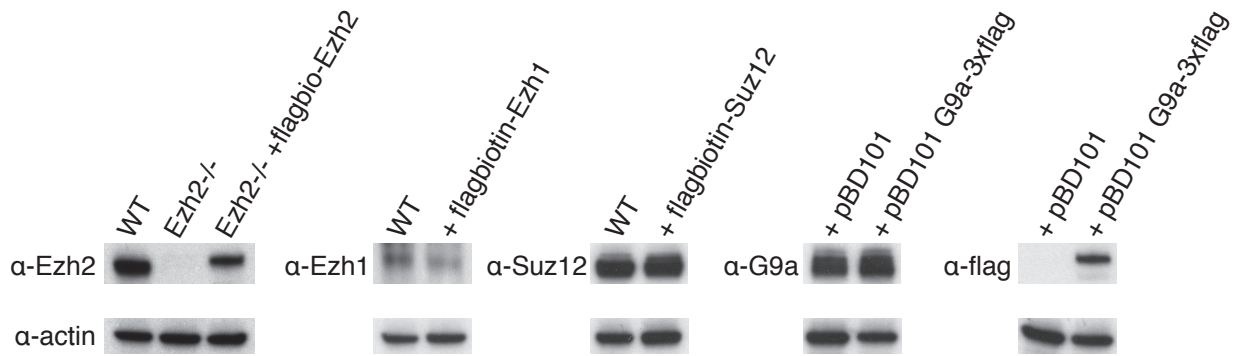

**b**

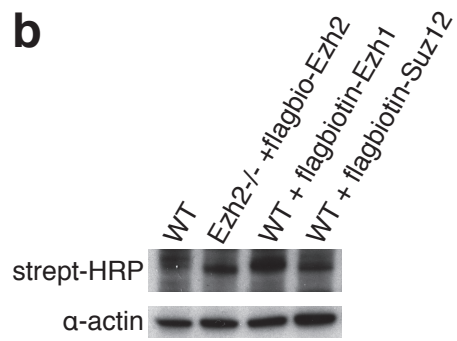

# Supplementary Figure 2

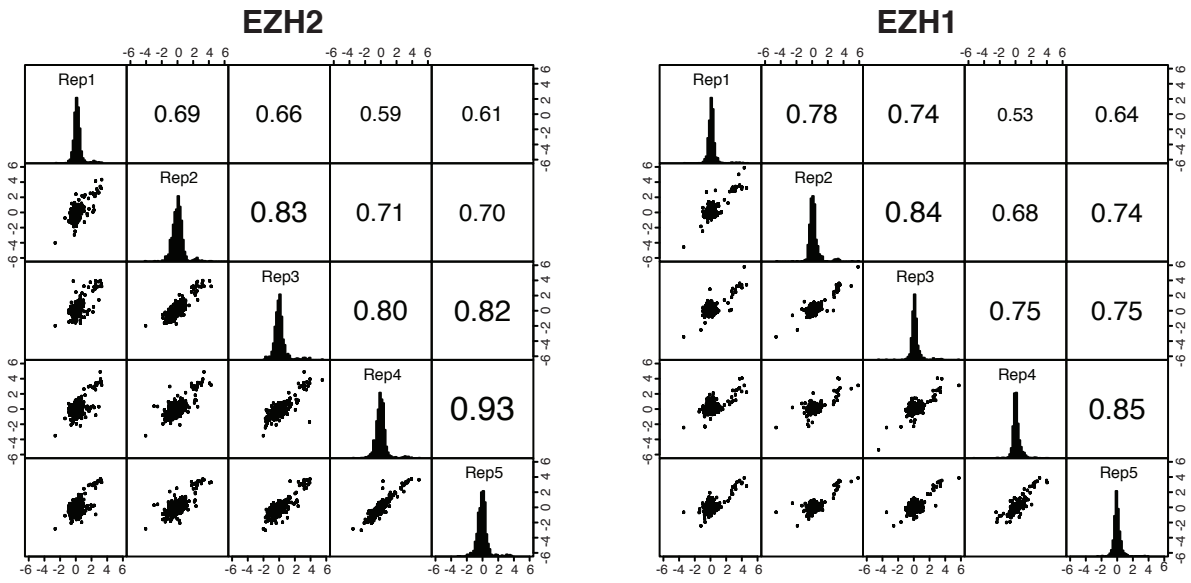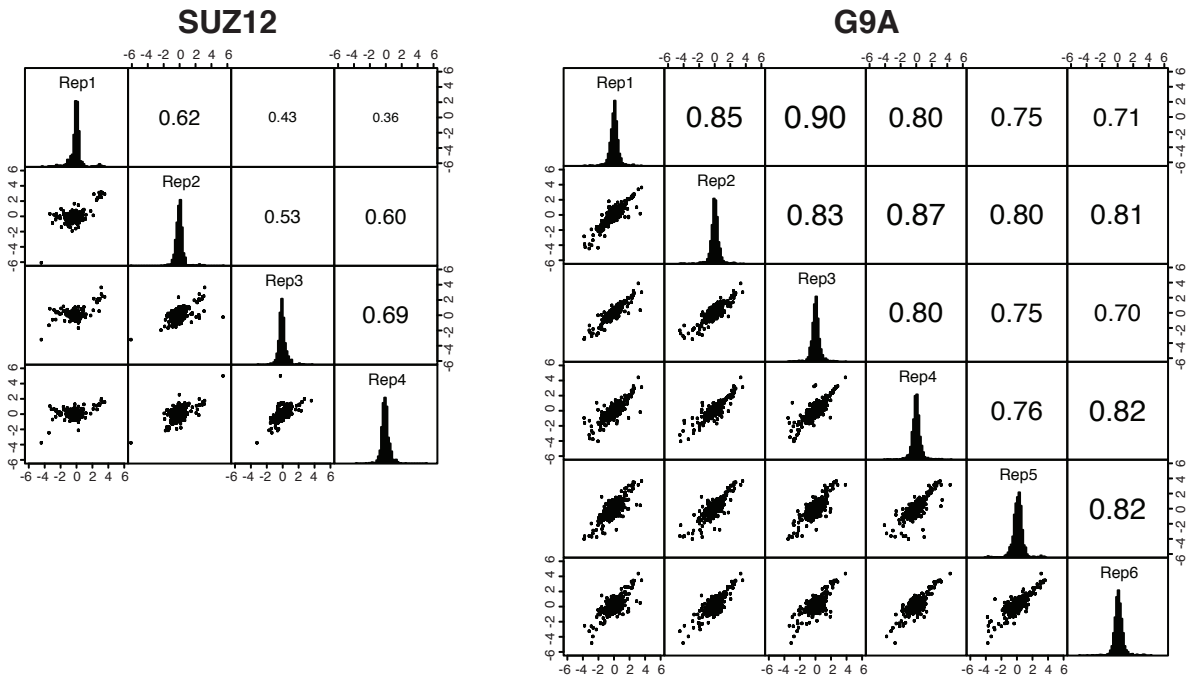

# Supplementary Figure 3

## Residual expression after knock-down

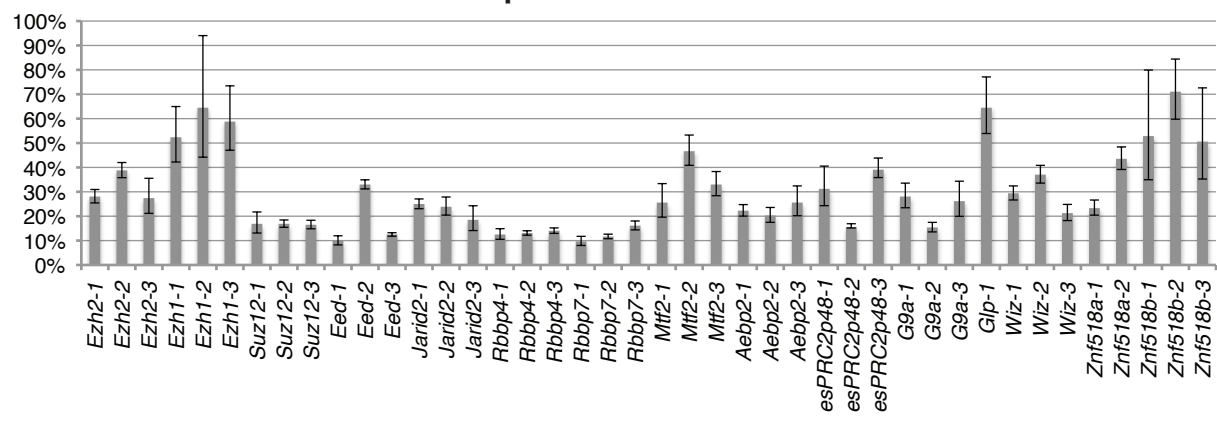

Supplementary Figure 4

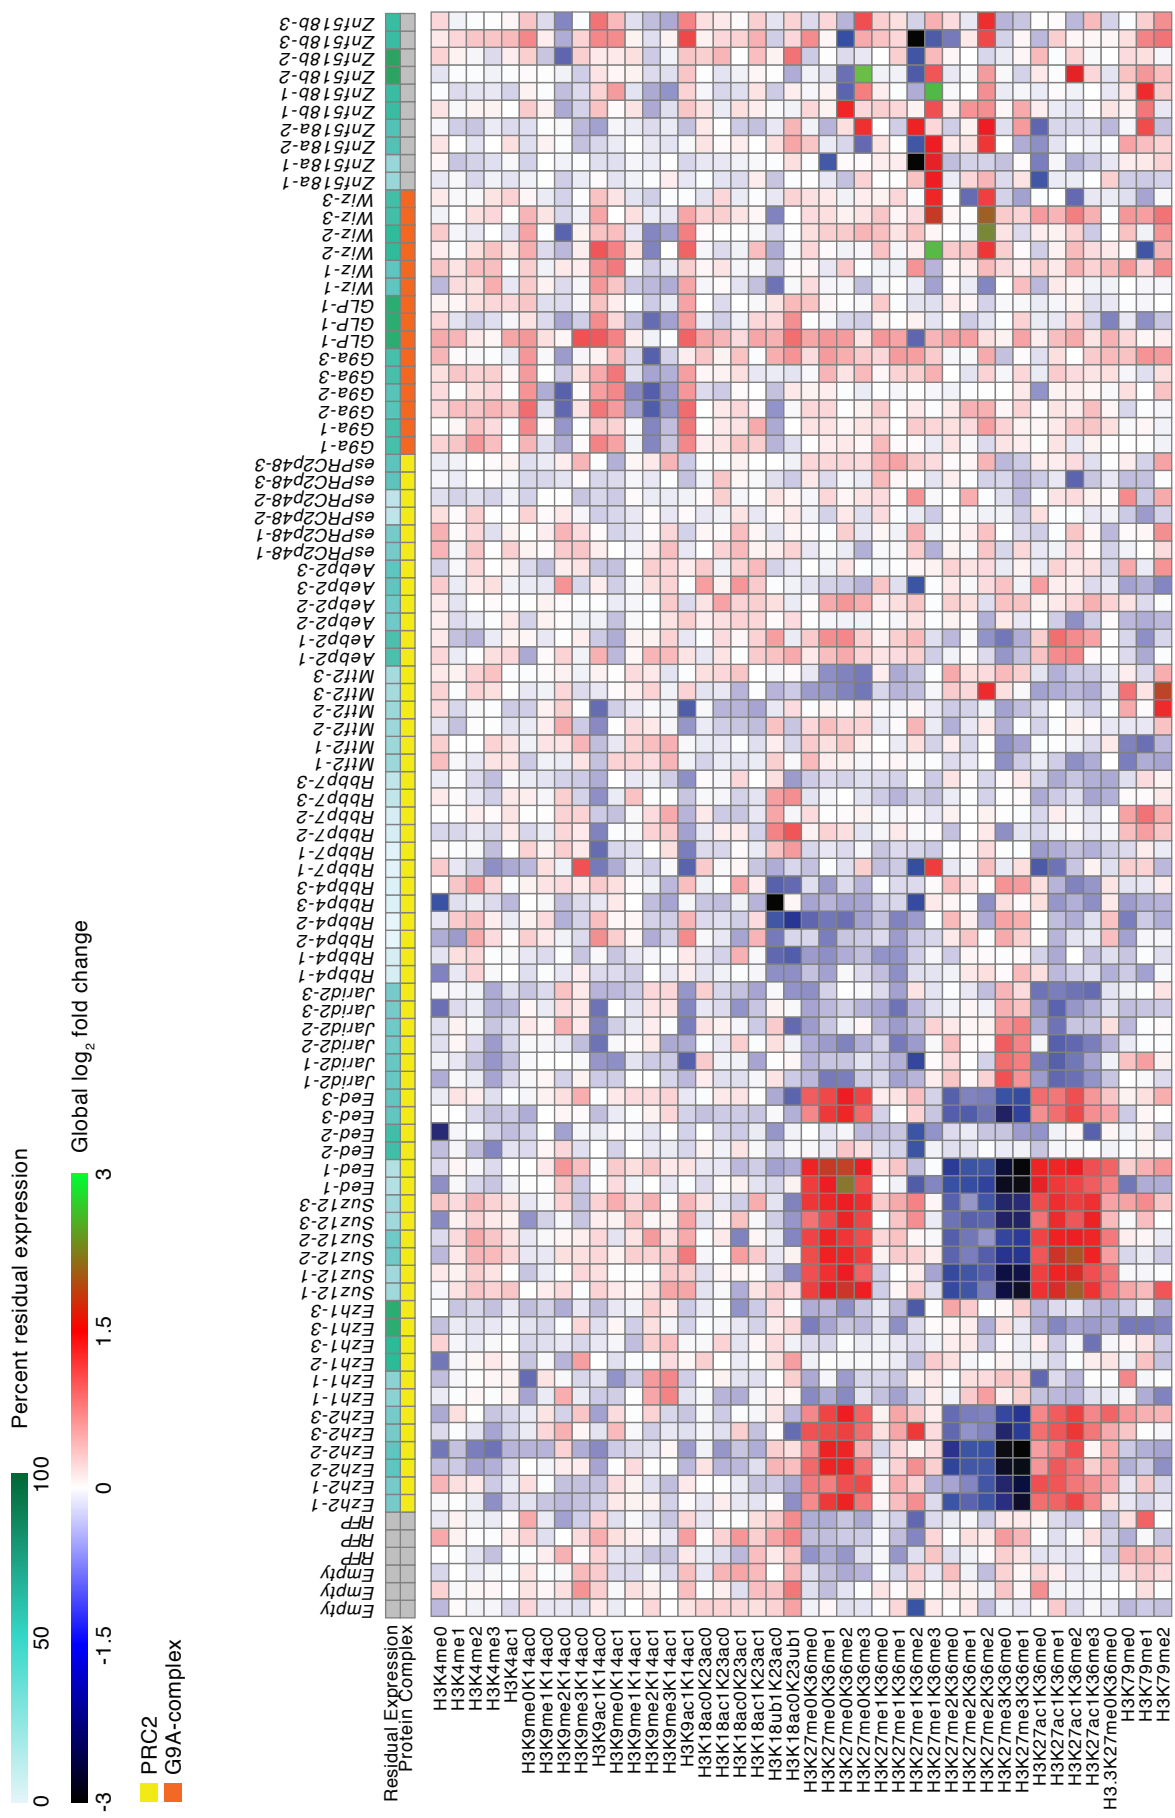

Supplement: supp_M114.044586_20150217_Maier-et-al_MCP_SuppInfo.pdf [file supp_M114.044586_20150217_Maier-et-al_MCP_SuppInfo.pdf]
